# Supplementary material for: The Mineral Dust Cycle in EMAC 2.40: sensitivity to the spectral resolution and the dust emission scheme
Source: Copernicus journal article supplement (doi:10.5194/acp-12-1611-2012), 2012-02-14
Supplement: Supplementary file 1 [file acp-12-1611-2012-supplement.zip]

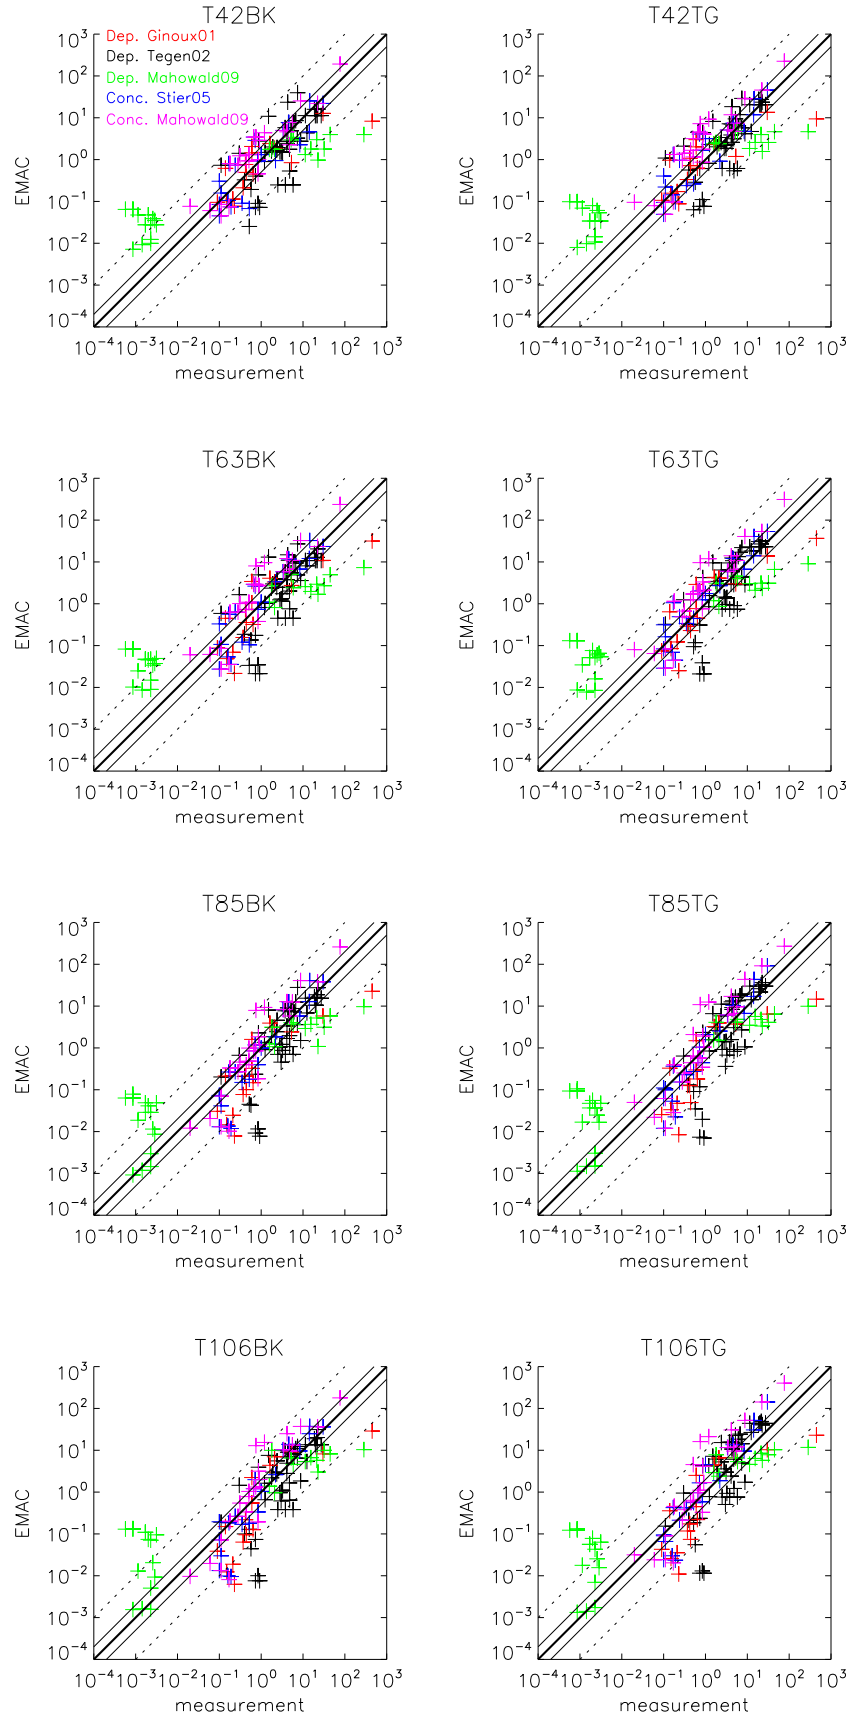

**Fig. S1.** Simulated versus measured dust deposition ( $\text{mg m}^{-2} \text{yr}^{-1}$ ) and surface dust concentration ( $\mu\text{g m}^{-3}$ ). Measurements are described in Sect. 2.2.1. Deposition: red: Ginoux et al. (2001), black: Tegen et al. (2002), green: Mahowald et al. (2009); Concentration: blue: Stier et al. (2005), magenta: Mahowald et al. (2009). The bold solid line indicates the 1:1 ratio, thin solid lines the 1:2 and 2:1 ratios, and dashed lines the 1:10 and 10:1 ratios.
