# Supplementary material for: The Mineral Dust Cycle in EMAC 2.40: sensitivity to the spectral resolution and the dust emission scheme
Source: Copernicus journal article supplement (doi:10.5194/acp-12-1611-2012), 2012-02-14
Supplement: Supplementary file 2 [file acp-12-1611-2012-supplement.zip]

# The Basic Sulphur Chemical Mechanism of MECCA

KPP version: 2.2.1\_rs5

MECCA version: 2.5n

Date: June 16, 2011.

Selected reactions:

“Tr && G && !C && !Cl && !Br && !I && !Hg”

Number of aerosol phases: 0

Number of species in selected mechanism:

Gas phase: 31

Aqueous phase: 0

All species: 31

Number of reactions in selected mechanism:

Gas phase (Gnn): 44

Aqueous phase (Annn): 0

Henry (Hnn): 0

Photolysis (Jnn): 13

Heterogeneous (HETnnn): 0

Equilibria (EQnn): 0

Isotope exchange (IEXnnn): 0

Dummy (Dnn): 0

All equations: 57

Further information can be found in the article “Technical Note:

The new comprehensive atmospheric chemistry module MECCA” by  
R. Sander et al. (Atmos. Chem. Phys. **5**, 445-450, 2005), available at

<http://www.atmos-chem-phys.net/5/445>.

Table 1: Gas phase reactions

| #      | labels | reaction                                        | rate coefficient                                      | reference                                             |
|--------|--------|-------------------------------------------------|-------------------------------------------------------|-------------------------------------------------------|
| G1000  | StTrG  | $O_2 + O(^1D) \rightarrow O(^3P) + O_2$         | $3.3E-11*EXP(55./temp)$                               | Sander et al. (2006)                                  |
| G1001  | StTrG  | $O_2 + O(^3P) \rightarrow O_3$                  | $6.E-34*((temp/300.)*(-2.4))*cair$                    | Sander et al. (2006)                                  |
| G1002a | StTrG  | $O_3 + O(^1D) \rightarrow 2 O_2$                | $1.2E-10$                                             | Sander et al. (2006)*                                 |
| G1003a | StTrG  | $O_3 + O(^3P) \rightarrow 2 O_2$                | $8.E-12*EXP(-2060./temp)$                             | Sander et al. (2006)                                  |
| G2100  | StTrG  | $H + O_2 \rightarrow HO_2$                      | $k\_3rd(temp, cair, 4.4E-32, 1.3, 4.7E-11, 0.2, 0.6)$ | Sander et al. (2006)                                  |
| G2104  | StTrG  | $OH + O_3 \rightarrow HO_2 + O_2$               | $1.7E-12*EXP(-940./temp)$                             | Sander et al. (2006)                                  |
| G2105  | StTrG  | $OH + H_2 \rightarrow H_2O + H$                 | $2.8E-12*EXP(-1800./temp)$                            | Sander et al. (2006)                                  |
| G2107  | StTrG  | $HO_2 + O_3 \rightarrow OH + 2 O_2$             | $1.E-14*EXP(-490./temp)$                              | Sander et al. (2006)                                  |
| G2109  | StTrG  | $HO_2 + OH \rightarrow H_2O + O_2$              | $4.8E-11*EXP(250./temp)$                              | Sander et al. (2006)                                  |
| G2110  | StTrG  | $HO_2 + HO_2 \rightarrow H_2O_2 + O_2$          | $k\_H02\_H02$                                         | Christensen et al. (2002), Kircher and Sander (1984)* |
| G2111  | StTrG  | $H_2O + O(^1D) \rightarrow 2 OH$                | $1.63E-10*EXP(60./temp)$                              | Sander et al. (2006)                                  |
| G2112  | StTrG  | $H_2O_2 + OH \rightarrow H_2O + HO_2$           | $1.8E-12$                                             | Sander et al. (2006)                                  |
| G3101  | StTrG  | $N_2 + O(^1D) \rightarrow O(^3P) + N_2$         | $2.15E-11*EXP(110./temp)$                             | Sander et al. (2006)                                  |
| G3103  | StTrGN | $NO + O_3 \rightarrow NO_2 + O_2$               | $3.E-12*EXP(-1500./temp)$                             | Sander et al. (2006)                                  |
| G3106  | StTrGN | $NO_2 + O_3 \rightarrow NO_3 + O_2$             | $1.2E-13*EXP(-2450./temp)$                            | Sander et al. (2006)                                  |
| G3108  | StTrGN | $NO_3 + NO \rightarrow 2 NO_2$                  | $1.5E-11*EXP(170./temp)$                              | Sander et al. (2006)                                  |
| G3109  | StTrGN | $NO_3 + NO_2 \rightarrow N_2O_5$                | $k\_N03\_N02$                                         | Sander et al. (2006)*                                 |
| G3110  | StTrGN | $N_2O_5 \rightarrow NO_2 + NO_3$                | $k\_N03\_N02/(2.7E-27*EXP(11000./temp))$              | Sander et al. (2006)*                                 |
| G3201  | StTrGN | $NO + HO_2 \rightarrow NO_2 + OH$               | $3.5E-12*EXP(250./temp)$                              | Sander et al. (2006)                                  |
| G3202  | StTrGN | $NO_2 + OH \rightarrow HNO_3$                   | $k\_3rd(temp, cair, 1.8E-30, 3.0, 2.8E-11, 0., 0.6)$  | Sander et al. (2006)                                  |
| G3203  | StTrGN | $NO_2 + HO_2 \rightarrow HNO_4$                 | $k\_N02\_H02$                                         | Sander et al. (2006)*                                 |
| G3204  | TrGN   | $NO_3 + HO_2 \rightarrow NO_2 + OH + O_2$       | $3.5E-12$                                             | Sander et al. (2006)                                  |
| G3206  | StTrGN | $HNO_3 + OH \rightarrow H_2O + NO_3$            | $k\_HN03\_OH$                                         | Sander et al. (2006)*                                 |
| G3207  | StTrGN | $HNO_4 \rightarrow NO_2 + HO_2$                 | $k\_N02\_H02/(2.1E-27*EXP(10900./temp))$              | Sander et al. (2006)*                                 |
| G3208  | StTrGN | $HNO_4 + OH \rightarrow NO_2 + H_2O$            | $1.3E-12*EXP(380./temp)$                              | Sander et al. (2006)                                  |
| G4101  | StTrG  | $CH_4 + OH \rightarrow CH_3O_2 + H_2O$          | $1.85E-20*EXP(2.82*log(temp)-987./temp)$              | Atkinson (2003)*                                      |
| G4102  | TrG    | $CH_3OH + OH \rightarrow HCHO + HO_2$           | $2.9E-12*EXP(-345./temp)$                             | Sander et al. (2006)                                  |
| G4103  | StTrG  | $CH_3O_2 + HO_2 \rightarrow CH_3OOH + O_2$      | $4.1E-13*EXP(750./temp)$                              | Sander et al. (2006)*                                 |
| G4104  | StTrGN | $CH_3O_2 + NO \rightarrow HCHO + NO_2 + HO_2$   | $2.8E-12*EXP(300./temp)$                              | Sander et al. (2006)                                  |
| G4105  | TrGN   | $CH_3O_2 + NO_3 \rightarrow HCHO + HO_2 + NO_2$ | $1.3E-12$                                             | Atkinson et al. (2006)                                |

Table 1: Gas phase reactions (... continued)

| #      | labels | reaction                                                                                                                                           | rate coefficient                                                                                 | reference                 |
|--------|--------|----------------------------------------------------------------------------------------------------------------------------------------------------|--------------------------------------------------------------------------------------------------|---------------------------|
| G4106a | StTrG  | $\text{CH}_3\text{O}_2 + \text{CH}_3\text{O}_2 \rightarrow 2 \text{HCHO} + 2 \text{HO}_2$                                                          | $9.5\text{E-}14 * \text{EXP}(390./\text{temp}) / (1. + 1./26.2 * \text{EXP}(1130./\text{temp}))$ | Sander et al. (2006)      |
| G4106b | StTrG  | $\text{CH}_3\text{O}_2 + \text{CH}_3\text{O}_2 \rightarrow \text{HCHO} + \text{CH}_3\text{OH} + \text{O}_2$                                        | $9.5\text{E-}14 * \text{EXP}(390./\text{temp}) / (1. + 26.2 * \text{EXP}(-1130./\text{temp}))$   | Sander et al. (2006)      |
| G4107  | StTrG  | $\text{CH}_3\text{OOH} + \text{OH} \rightarrow .7 \text{CH}_3\text{O}_2 + .3 \text{HCHO} + .3 \text{OH} + \text{H}_2\text{O}$                      | k_CH300H_OH                                                                                      | Sander et al. (2006)*     |
| G4108  | StTrG  | $\text{HCHO} + \text{OH} \rightarrow \text{CO} + \text{H}_2\text{O} + \text{HO}_2$                                                                 | $9.52\text{E-}18 * \text{EXP}(2.03 * \log(\text{temp}) + 636./\text{temp})$                      | Sivakumaran et al. (2003) |
| G4109  | TrGN   | $\text{HCHO} + \text{NO}_3 \rightarrow \text{HNO}_3 + \text{CO} + \text{HO}_2$                                                                     | $3.4\text{E-}13 * \text{EXP}(-1900./\text{temp})$                                                | Sander et al. (2006)*     |
| G4110  | StTrG  | $\text{CO} + \text{OH} \rightarrow \text{H} + \text{CO}_2$                                                                                         | $(1.57\text{E-}13 + \text{cair} * 3.54\text{E-}33)$                                              | McCabe et al. (2001)      |
| G9200  | StTrGS | $\text{SO}_2 + \text{OH} \rightarrow \text{H}_2\text{SO}_4 + \text{HO}_2$                                                                          | k_3rd(temp, cair, 3.3E-31, 4.3, 1.6E-12, 0., 0.6)                                                | Sander et al. (2006)      |
| G9400a | TrGS   | $\text{DMS} + \text{OH} \rightarrow \text{CH}_3\text{SO}_2 + \text{HCHO}$                                                                          | $1.13\text{E-}11 * \text{EXP}(-253./\text{temp})$                                                | Atkinson et al. (2004)*   |
| G9400b | TrGS   | $\text{DMS} + \text{OH} \rightarrow \text{DMSO} + \text{HO}_2$                                                                                     | k_DMS_OH                                                                                         | Atkinson et al. (2004)*   |
| G9401  | TrGNS  | $\text{DMS} + \text{NO}_3 \rightarrow \text{CH}_3\text{SO}_2 + \text{HNO}_3 + \text{HCHO}$                                                         | $1.9\text{E-}13 * \text{EXP}(520./\text{temp})$                                                  | Atkinson et al. (2004)    |
| G9402  | TrGS   | $\text{DMSO} + \text{OH} \rightarrow .6 \text{SO}_2 + \text{HCHO} + .6 \text{CH}_3\text{O}_2 + .4 \text{HO}_2 + .4 \text{CH}_3\text{SO}_3\text{H}$ | 1.E-10                                                                                           | Hynes and Wine (1996)     |
| G9403  | TrGS   | $\text{CH}_3\text{SO}_2 \rightarrow \text{SO}_2 + \text{CH}_3\text{O}_2$                                                                           | $1.9\text{E}13 * \text{EXP}(-8661./\text{temp})$                                                 | Barone et al. (1995)      |
| G9404  | TrGS   | $\text{CH}_3\text{SO}_2 + \text{O}_3 \rightarrow \text{CH}_3\text{SO}_3$                                                                           | 3.E-13                                                                                           | Barone et al. (1995)      |
| G9405  | TrGS   | $\text{CH}_3\text{SO}_3 + \text{HO}_2 \rightarrow \text{CH}_3\text{SO}_3\text{H}$                                                                  | 5.E-11                                                                                           | Barone et al. (1995)      |

\*Notes:

Rate coefficients for three-body reactions are defined via the function `k_3rd`( $T, M, k_0^{300}, n, k_{\text{inf}}^{300}, m, f_c$ ). In the code, the temperature  $T$  is called `temp` and the concentration of “air molecules”  $M$  is called `cair`. Using the auxiliary variables  $k_0(T)$ ,  $k_{\text{inf}}(T)$ , and  $k_{\text{ratio}}$ , `k_3rd` is defined as:

$$k_0(T) = k_0^{300} \times \left( \frac{300\text{K}}{T} \right)^n \quad (1)$$

$$k_{\text{inf}}(T) = k_{\text{inf}}^{300} \times \left( \frac{300\text{K}}{T} \right)^m \quad (2)$$

$$k_{\text{ratio}} = \frac{k_0(T)M}{k_{\text{inf}}(T)} \quad (3)$$

$$\text{k\_3rd} = \frac{k_0(T)M}{1 + k_{\text{ratio}}} \times f_c^{\left( \frac{1}{1 + (\log_{10}(k_{\text{ratio}}))^2} \right)} \quad (4)$$

A similar function, called `k_3rd_iupac` here, is used by Atkinson et al. (2005) for three-body reactions. It has the same function parameters as `k_3rd` and it is defined

as:

$$k_0(T) = k_0^{300} \times \left( \frac{300\text{K}}{T} \right)^n \quad (5)$$

$$k_{\text{inf}}(T) = k_{\text{inf}}^{300} \times \left( \frac{300\text{K}}{T} \right)^m \quad (6)$$

$$k_{\text{ratio}} = \frac{k_0(T)M}{k_{\text{inf}}(T)} \quad (7)$$

$$N = 0.75 - 1.27 \times \log_{10}(f_c) \quad (8)$$

$$\text{k\_3rd\_iupac} = \frac{k_0(T)M}{1 + k_{\text{ratio}}} \times f_c^{\left( \frac{1}{1 + (\log_{10}(k_{\text{ratio}})/N)^2} \right)} \quad (9)$$

G1002a: The path leading to  $2 \text{ O}(^3\text{P}) + \text{O}_2$  results in a null cycle regarding odd oxygen and is neglected.

G2110: The rate coefficient is: `k_HO2_HO2 = (1.5E-12*EXP(19./temp)+1.7E-33*EXP(1000./temp)*cair)*(1.+1.4E-21*EXP(2200./temp)*C(ind_H2O))`. The value for the first (pressure-independent) part is from Christensen et al. (2002), the water term from Kircher and Sander (1984).

G3109: The rate coefficient is: `k_NO3_NO2 = k_3rd(temp,cair,2.E-30,4.4,1.4E-12,0.7,0.6)`.

G3110: The rate coefficient is defined as backward reaction divided by equilibrium constant.

G3203: The rate coefficient is: `k_NO2_HO2 = k_3rd(temp,cair,1.8E-31,3.2,4.7E-12,1.4,0.6)`.

G3206: The rate coefficient is: `k_HNO3_OH = 2.4E-14 * EXP(460./temp) + 1./ ( 1./ (6.5E-34 * EXP(1335./temp)*cair) + 1./ (2.7E-17 * EXP(2199./temp)) )`

G3207: The rate coefficient is defined as backward reaction divided by equilibrium constant.

G4103: Sander et al. (2006) recommend a zero product yield for HCHO.

G4107: The rate coefficient is: `k_CH3OOH_OH = 3.8E-12*EXP(200./temp)`.

G4109: The same temperature dependence assumed as for  $\text{CH}_3\text{CHO} + \text{NO}_3$ .

G9400b: Addition path. The rate coefficient is: `k_DMS_OH = 1.0E-39*EXP(5820./temp)*C(ind_O2) / (1.+5.0E-30*EXP(6280./temp)*C(ind_O2))`.

Table 2: Photolysis reactions

| #      | labels  | reaction                                                                                                  | rate coefficient | reference |
|--------|---------|-----------------------------------------------------------------------------------------------------------|------------------|-----------|
| J1000  | StTrGJ  | $\text{O}_2 + h\nu \rightarrow \text{O}(^3\text{P}) + \text{O}(^3\text{P})$                               | jx(ip_02)        | see note  |
| J1001a | StTrGJ  | $\text{O}_3 + h\nu \rightarrow \text{O}(^1\text{D})$                                                      | jx(ip_01D)       | see note  |
| J1001b | StTrGJ  | $\text{O}_3 + h\nu \rightarrow \text{O}(^3\text{P})$                                                      | jx(ip_03P)       | see note  |
| J2101  | StTrGJ  | $\text{H}_2\text{O}_2 + h\nu \rightarrow 2 \text{OH}$                                                     | jx(ip_H202)      | see note  |
| J3101  | StTrGNJ | $\text{NO}_2 + h\nu \rightarrow \text{NO} + \text{O}(^3\text{P})$                                         | jx(ip_N02)       | see note  |
| J3103a | StTrGNJ | $\text{NO}_3 + h\nu \rightarrow \text{NO}_2 + \text{O}(^3\text{P})$                                       | jx(ip_N020)      | see note  |
| J3103b | StTrGNJ | $\text{NO}_3 + h\nu \rightarrow \text{NO}$                                                                | jx(ip_N002)      | see note  |
| J3104a | StTrGNJ | $\text{N}_2\text{O}_5 + h\nu \rightarrow \text{NO}_2 + \text{NO}_3$                                       | jx(ip_N205)      | see note  |
| J3201  | StTrGNJ | $\text{HNO}_3 + h\nu \rightarrow \text{NO}_2 + \text{OH}$                                                 | jx(ip_HN03)      | see note  |
| J3202  | StTrGNJ | $\text{HNO}_4 + h\nu \rightarrow .667 \text{NO}_2 + .667 \text{HO}_2 + .333 \text{NO}_3 + .333 \text{OH}$ | jx(ip_HN04)      | see note  |
| J4100  | StTrGJ  | $\text{CH}_3\text{OOH} + h\nu \rightarrow \text{HCHO} + \text{OH} + \text{HO}_2$                          | jx(ip_CH300H)    | see note  |
| J4101a | StTrGJ  | $\text{HCHO} + h\nu \rightarrow \text{H}_2 + \text{CO}$                                                   | jx(ip_COH2)      | see note  |
| J4101b | StTrGJ  | $\text{HCHO} + h\nu \rightarrow \text{H} + \text{CO} + \text{HO}_2$                                       | jx(ip_CH0H)      | see note  |

\*Notes:

J-values are calculated with an external module and then supplied to the MECCA chemistry

Table 3: Henry’s law coefficients

| substance                      | $k_H^\ominus$<br>M/atm               | $-\Delta_{\text{soln}}H/R$<br>K | reference                       |
|--------------------------------|--------------------------------------|---------------------------------|---------------------------------|
| O <sub>2</sub>                 | $1.3 \times 10^{-3}$                 | 1500.                           | Wilhelm et al. (1977)           |
| O <sub>3</sub>                 | $1.2 \times 10^{-2}$                 | 2560.                           | Chameides (1984)                |
| OH                             | $3.0 \times 10^1$                    | 4300.                           | Hanson et al. (1992)            |
| HO <sub>2</sub>                | $3.9 \times 10^3$                    | 5900.                           | Hanson et al. (1992)            |
| H <sub>2</sub> O <sub>2</sub>  | $1. \times 10^5$                     | 6338.                           | Lind and Kok (1994)             |
| NO                             | $1.9 \times 10^{-3}$                 | 1480.                           | Schwartz and White (1981)       |
| NO <sub>2</sub>                | $7.0 \times 10^{-3}$                 | 2500.                           | Lee and Schwartz (1981)*        |
| NO <sub>3</sub>                | 2.                                   | 2000.                           | Thomas et al. (1993)            |
| HNO <sub>3</sub>               | $2.45 \times 10^6 / 1.5 \times 10^1$ | 8694.                           | Brimblecombe and Clegg (1989)*  |
| HNO <sub>4</sub>               | $1.2 \times 10^4$                    | 6900.                           | Régimbal and Mozurkewich (1997) |
| CH <sub>3</sub> O <sub>2</sub> | 6.                                   | 5600.                           | Jacob (1986)*                   |
| CH <sub>3</sub> OOH            | $3.0 \times 10^2$                    | 5322.                           | Lind and Kok (1994)             |
| HCHO                           | $7.0 \times 10^3$                    | 6425.                           | Chameides (1984)                |
| CO <sub>2</sub>                | $3.1 \times 10^{-2}$                 | 2423.                           | Chameides (1984)                |
| SO <sub>2</sub>                | 1.2                                  | 3120.                           | Chameides (1984)                |
| H <sub>2</sub> SO <sub>4</sub> | $1. \times 10^{11}$                  | 0.                              | see note                        |
| DMSO                           | $5. \times 10^4$                     | 6425.                           | De Bruyn et al. (1994)*         |

\*Notes:

The temperature dependence of the Henry constants is:

$$K_H = K_H^\ominus \times \exp \left( \frac{-\Delta_{\text{soln}}H}{R} \left( \frac{1}{T} - \frac{1}{T^\ominus} \right) \right)$$

where  $\Delta_{\text{soln}}H$  = molar enthalpy of dissolution [J/mol]and  $R = 8.314 \text{ J}/(\text{mol K})$ .NO<sub>2</sub>: The temperature dependence is from Chameides (1984).HNO<sub>3</sub>: Calculated using the acidity constant from Davis and de Bruin (1964).CH<sub>3</sub>O<sub>2</sub>: This value was estimated by Jacob (1986).H<sub>2</sub>SO<sub>4</sub>: To account for the very high Henry’s law coefficient of H<sub>2</sub>SO<sub>4</sub>, a very high value was chosen arbitrarily.

DMSO: Lower limit cited from another reference.

Table 4: Accommodation coefficients

| substance                         | $\alpha^\ominus$     | $\frac{-\Delta_{\text{obs}}H/R}{\text{K}}$ | reference                     |
|-----------------------------------|----------------------|--------------------------------------------|-------------------------------|
| O <sub>2</sub>                    | 0.01                 | 2000.                                      | see note                      |
| O <sub>3</sub>                    | 0.002                | 0.                                         | DeMore et al. (1997)*         |
| OH                                | 0.01                 | 0.                                         | Takami et al. (1998)*         |
| HO <sub>2</sub>                   | 0.5                  | 0.                                         | Thornton and Abbatt (2005)    |
| H <sub>2</sub> O <sub>2</sub>     | 0.077                | 3127.                                      | Worsnop et al. (1989)         |
| NO                                | $5.0 \times 10^{-5}$ | 0.                                         | Saastad et al. (1993)*        |
| NO <sub>2</sub>                   | 0.0015               | 0.                                         | Ponche et al. (1993)*         |
| NO <sub>3</sub>                   | 0.04                 | 0.                                         | Rudich et al. (1996)*         |
| N <sub>2</sub> O <sub>5</sub>     | 0.1                  | 0.                                         | DeMore et al. (1997)*         |
| HNO <sub>3</sub>                  | 0.5                  | 0.                                         | Abbatt and Waschewsky (1998)* |
| HNO <sub>4</sub>                  | 0.1                  | 0.                                         | DeMore et al. (1997)*         |
| CH <sub>3</sub> O <sub>2</sub>    | 0.01                 | 2000.                                      | see note                      |
| CH <sub>3</sub> OOH               | 0.0046               | 3273.                                      | Magi et al. (1997)            |
| HCHO                              | 0.04                 | 0.                                         | DeMore et al. (1997)*         |
| CO <sub>2</sub>                   | 0.01                 | 2000.                                      | see note                      |
| SO <sub>2</sub>                   | 0.11                 | 0.                                         | DeMore et al. (1997)          |
| H <sub>2</sub> SO <sub>4</sub>    | 0.65                 | 0.                                         | Pöschl et al. (1998)*         |
| CH <sub>3</sub> SO <sub>3</sub> H | 0.076                | 1762.                                      | De Bruyn et al. (1994)        |
| DMSO                              | 0.048                | 2578.                                      | De Bruyn et al. (1994)        |

\*Notes:

The temperature dependence of the accommodation coefficients is given by (Jayne et al., 1991):

$$\begin{aligned} \frac{\alpha}{1-\alpha} &= \exp\left(\frac{-\Delta_{\text{obs}}G}{RT}\right) \\ &= \exp\left(\frac{-\Delta_{\text{obs}}H}{RT} + \frac{\Delta_{\text{obs}}S}{R}\right) \end{aligned}$$

where  $\Delta_{\text{obs}}G$  is the Gibbs free energy barrier of the transition state toward solution (Jayne et al., 1991), and  $\Delta_{\text{obs}}H$  and  $\Delta_{\text{obs}}S$  are the corresponding enthalpy and entropy, respectively. The equation can be rearranged to:

$$\ln\left(\frac{\alpha}{1-\alpha}\right) = \frac{-\Delta_{\text{obs}}H}{R} \times \frac{1}{T} + \frac{-\Delta_{\text{obs}}S}{R}$$

and further:

$$\text{d} \ln\left(\frac{\alpha}{1-\alpha}\right) / \text{d}\left(\frac{1}{T}\right) = \frac{-\Delta_{\text{obs}}H}{R}$$

If no data were available, a value of  $\alpha = 0.01$ ,  $\alpha = 0.1$ , or  $\alpha = 0.5$ , and a temperature dependence of  $-\Delta_{\text{obs}}H/R = 2000$  K has been assumed.

O<sub>2</sub>: Estimate.

O<sub>3</sub>: Value measured at 292 K.

OH: Value measured at 293 K.

NO: Value measured between 193 and 243 K.

NO<sub>2</sub>: Value measured at 298 K.

NO<sub>3</sub>: Value is a lower limit, measured at 273 K.

N<sub>2</sub>O<sub>5</sub>: Value for sulfuric acid, measured between 195 and 300 K.

HNO<sub>3</sub>: Value measured at room temperature. Abbatt and Waschewsky (1998) say  $\gamma > 0.2$ . Here  $\alpha = 0.5$  is used.

HNO<sub>4</sub>: Value measured at 200 K for water ice.

CH<sub>3</sub>O<sub>2</sub>: Estimate.

HCHO: Value measured between 260 and 270 K.

CO<sub>2</sub>: Estimate.

H<sub>2</sub>SO<sub>4</sub>: Value measured at 303 K.

## References

- Abbatt, J. P. D. and Waschewsky, G. C. G.: Heterogeneous interactions of HOBr, HNO<sub>3</sub>, O<sub>3</sub>, and NO<sub>2</sub> with deliquescent NaCl aerosols at room temperature, *J. Phys. Chem. A*, 102, 3719–3725, 1998.
- Atkinson, R.: Kinetics of the gas-phase reactions of OH radicals with alkanes and cycloalkanes, *Atmos. Chem. Phys.*, 3, 2233–2307, 2003.
- Atkinson, R., Baulch, D. L., Cox, R. A., Crowley, J. N., Hampson, R. F., Hynes, R. G., Jenkin, M. E., Rossi, M. J., and Troe, J.: Evaluated kinetic and photochemical data for atmospheric chemistry: Volume I – gas phase reactions of O<sub>x</sub>, HO<sub>x</sub>, NO<sub>x</sub> and SO<sub>x</sub> species, *Atmos. Chem. Phys.*, 4, 1461–1738, 2004.
- Atkinson, R., Baulch, D. L., Cox, R. A., Crowley, J. N., Hampson, Jr., R. F., Hynes, R. G., Jenkin, M. E., Kerr, J. A., Rossi, M. J., and Troe, J.: Summary of evaluated kinetic and photochemical data for atmospheric chemistry: Web version March 2005, <http://www.iupac-kinetic.ch.cam.ac.uk/>, 2005.
- Atkinson, R., Baulch, D. L., Cox, R. A., Crowley, J. N., Hampson, R. F., Hynes, R. G., Jenkin, M. E., Rossi, M. J., and Troe, J.: Evaluated kinetic and photochemical data for atmospheric chemistry: Volume II – gas phase reactions of organic species, *Atmos. Chem. Phys.*, 6, 3625–4055, 2006.
- Barone, S. B., Turnipseed, A. A., and Ravishankara, A. R.: Role of adducts in the atmospheric oxidation of dimethyl sulfide, *Faraday Discuss.*, 100, 39–54, 1995.
- Brimblecombe, P. and Clegg, S. L.: Erratum, *J. Atmos. Chem.*, 8, 95, 1989.
- Chameides, W. L.: The photochemistry of a remote marine stratiform cloud, *J. Geophys. Res.*, 89D, 4739–4755, 1984.
- Christensen, L. E., Okumura, M., Sander, S. P., Salawitch, R. J., Toon, G. C., Sen, B., Blavier, J.-F., and Jucks, K. W.: Kinetics of HO<sub>2</sub> + HO<sub>2</sub> → H<sub>2</sub>O<sub>2</sub> + O<sub>2</sub>: Implications for stratospheric H<sub>2</sub>O<sub>2</sub>, *Geophys. Res. Lett.*, 29, doi:10.1029/2001GL014525, 2002.
- Davis, Jr., W. and de Bruin, H. J.: New activity coefficients of 0–100 per cent aqueous nitric acid, *J. Inorg. Nucl. Chem.*, 26, 1069–1083, 1964.
- De Bruyn, W. J., Shorter, J. A., Davidovits, P., Worsnop, D. R., Zahniser, M. S., and Kolb, C. E.: Uptake of gas-phase sulfur species methanesulfonic acid, dimethylsulfoxide, and dimethyl sulfone by aqueous surfaces, *J. Geophys. Res.*, 99D, 16 927–16 932, 1994.
- DeMore, W. B., Sander, S. P., Golden, D. M., Hampson, R. F., Kurylo, M. J., Howard, C. J., Ravishankara, A. R., Kolb, C. E., and Molina, M. J.: Chemical kinetics and photochemical data for use in stratospheric modeling. Evaluation number 12, JPL Publication 97-4, Jet Propulsion Laboratory, Pasadena, CA, 1997.
- Hanson, D. R., Burkholder, J. B., Howard, C. J., and Ravishankara, A. R.: Measurement of OH and HO<sub>2</sub> radical uptake coefficients on water and sulfuric acid surfaces, *J. Phys. Chem.*, 96, 4979–4985, 1992.
- Hynes, A. J. and Wine, P. H.: The atmospheric chemistry of dimethylsulfoxide (DMSO) kinetics and mechanism of the OH + DMSO reaction, *J. Atmos. Chem.*, 24, 23–37, 1996.
- Jacob, D. J.: Chemistry of OH in remote clouds and its role in the production of formic acid and peroxy-monosulfate, *J. Geophys. Res.*, 91D, 9807–9826, 1986.
- Jayne, J. T., Duan, S. X., Davidovits, P., Worsnop, D. R., Zahniser, M. S., and Kolb, C. E.: Uptake of gas-phase alcohol and organic acid molecules by water surfaces, *J. Phys. Chem.*, 95, 6329–6336, 1991.
- Kircher, C. C. and Sander, S. P.: Kinetics and mechanism of HO<sub>2</sub> and DO<sub>2</sub> disproportionations, *J. Phys. Chem.*, 88, 2082–2091, 1984.
- Lee, Y.-N. and Schwartz, S. E.: Reaction kinetics of nitrogen dioxide with liquid water at low partial pressure, *J. Phys. Chem.*, 85, 840–848, 1981.
- Lind, J. A. and Kok, G. L.: Correction to “Henry’s law determinations for aqueous solutions of hydrogen peroxide, methylhydroperoxide, and peroxyacetic acid” by John A. Lind and Gregory L. Kok, *J. Geophys. Res.*, 99D, 21 119, 1994.
- Magi, L., Schweitzer, F., Pallares, C., Cherif, S., , Mirabel, P., and George, C.: Investigation of the uptake rate of ozone and methyl hydroperoxide by water surfaces, *J. Phys. Chem. A*, 101, 4943–4949, 1997.
- McCabe, D. C., Gierczak, T., Talukdar, R. K., and Ravishankara, A. R.: Kinetics of the reaction OH + CO under atmospheric conditions, *Geophys. Res. Lett.*, 28, 3135–3138, 2001.
- Ponche, J. L., George, C., and Mirabel, P.: Mass transfer at the air/water interface: Mass accommodation coefficients of SO<sub>2</sub>, HNO<sub>3</sub>, NO<sub>2</sub> and NH<sub>3</sub>, *J. Atmos. Chem.*, 16, 1–21, 1993.
- Pöschl, U., Canagaratna, M., Jayne, J. T., Molina, L. T., Worsnop, D. R., Kolb, C. E., and Molina, M. J.: Mass accommodation coefficient of H<sub>2</sub>SO<sub>4</sub>



- vapor on aqueous sulfuric acid surfaces and gaseous diffusion coefficient of  $\text{H}_2\text{SO}_4$  in  $\text{N}_2/\text{H}_2\text{O}$ , *J. Phys. Chem. A*, 102, 10082–10089, 1998.
- Régimbal, J.-M. and Mozurkewich, M.: Peroxynitric acid decay mechanisms and kinetics at low pH, *J. Phys. Chem. A*, 101, 8822–8829, 1997.
- Rudich, Y., Talukdar, R. K., Imamura, T., Fox, R. W., and Ravishankara, A. R.: Uptake of  $\text{NO}_3$  on KI solutions: Rate coefficient for the  $\text{NO}_3 + \text{I}^-$  reaction and gas-phase diffusion coefficients for  $\text{NO}_3$ , *Chem. Phys. Lett.*, 261, 467–473, 1996.
- Saastad, O. W., Ellermann, T., and Nielsen, C. J.: On the adsorption of NO and  $\text{NO}_2$  on cold  $\text{H}_2\text{O}/\text{H}_2\text{SO}_4$  surfaces, *Geophys. Res. Lett.*, 20, 1191–1193, 1993.
- Sander, S. P., Friedl, R. R., Golden, D. M., Kurylo, M. J., Moortgat, G. K., Keller-Rudek, H., Wine, P. H., Ravishankara, A. R., Kolb, C. E., Molina, M. J., Finlayson-Pitts, B. J., Huie, R. E., and Orkin, V. L.: Chemical Kinetics and Photochemical Data for Use in Atmospheric Studies, Evaluation Number 15, JPL Publication 06-2, Jet Propulsion Laboratory, Pasadena, CA, 2006.
- Schwartz, S. E. and White, W. H.: Solubility equilibria of the nitrogen oxides and oxyacids in dilute aqueous solution, in: *Advances in Environmental Science and Engineering*, edited by Pfafflin, J. R. and Ziegler, E. N., vol. 4, pp. 1–45, Gordon and Breach Science Publishers, NY, 1981.
- Sivakumaran, V., Hölscher, D., Dillon, T. J., and Crowley, J. N.: Reaction between OH and HCHO: temperature dependent rate coefficients (202–399 K) and product pathways (298 K), *Phys. Chem. Chem. Phys.*, 5, 4821–4827, 2003.
- Takami, A., Kato, S., Shimono, A., and Koda, S.: Uptake coefficient of OH radical on aqueous surface, *Chem. Phys.*, 231, 215–227, 1998.
- Thomas, K., Volz-Thomas, A., and Kley, D.: Zur Wechselwirkung von  $\text{NO}_3$ -Radikalen mit wässrigen Lösungen: Bestimmung des Henry- und des Massenakkommodationskoeffizienten, Ph.D. thesis, Institut für Chemie und Dynamik der Geosphäre 2, Forschungszentrum Jülich GmbH, Germany, 1993.
- Thornton, J. and Abbatt, J. P. D.: Measurements of  $\text{HO}_2$  uptake to aqueous aerosol: Mass accommodation coefficients and net reactive loss, *J. Geophys. Res.*, 110D, doi:10.1029/2004JD005402, 2005.
- Wilhelm, E., Battino, R., and Wilcock, R. J.: Low-pressure solubility of gases in liquid water, *Chem. Rev.*, 77, 219–262, 1977.
- Worsnop, D. R., Zahniser, M. S., Kolb, C. E., Gardner, J. A., Watson, L. R., van Doren, J. M., Jayne, J. T., and Davidovits, P.: The temperature dependence of mass accommodation of  $\text{SO}_2$  and  $\text{H}_2\text{O}_2$  on aqueous surfaces, *J. Phys. Chem.*, 93, 1159–1172, 1989.
