# Supplementary material for: The Mineral Dust Cycle in EMAC 2.40: sensitivity to the spectral resolution and the dust emission scheme
Source: Copernicus journal article supplement (doi:10.5194/acp-12-1611-2012), 2012-02-14
Supplement: Supplementary file 3 [file acp-12-1611-2012-supplement.zip]

**Table S1.** List of dust measurement sites

| Dust deposition measurements |           |                                                   |                        |           |                                                   | Dust concentration measurements |           |                                     |
|------------------------------|-----------|---------------------------------------------------|------------------------|-----------|---------------------------------------------------|---------------------------------|-----------|-------------------------------------|
| Latitude                     | Longitude | $\frac{\text{mg}}{\text{m}^{-2} \text{ yr}^{-1}}$ | Latitude               | Longitude | $\frac{\text{mg}}{\text{m}^{-2} \text{ yr}^{-1}}$ | Latitude                        | Longitude | $\frac{\mu\text{g}}{\text{m}^{-3}}$ |
| Ginoux et al. (2001)         |           |                                                   | 18.50                  | -21.08    | 18.74                                             | Stier et al. (2005)             |           |                                     |
| 52.92                        | 174.06    | 0.60                                              | 19.00                  | -20.17    | 21.55                                             | -34.3                           | 18.5      | 2.20                                |
| 45.50                        | 6.50      | 2.10                                              | 20.92                  | -19.75    | 21.92                                             | -62.2                           | -58.3     | 0.52                                |
| 41.80                        | 2.30      | 5.30                                              | 20.92                  | -19.74    | 27.20                                             | -67.6                           | 62.5      | 0.10                                |
| 28.20                        | -177.35   | 0.60                                              | 20.92                  | -19.74    | 11.39                                             | -64.8                           | -64.1     | 0.35                                |
| 25.75                        | -80.25    | 1.62                                              | 21.15                  | -20.68    | 19.70                                             | -22.1                           | 167.0     | 0.17                                |
| 21.30                        | -157.6    | 0.42                                              | 21.15                  | -20.69    | 20.48                                             | -8.5                            | -179.2    | 0.19                                |
| 11.30                        | 162.30    | 0.44                                              | 21.15                  | -31.17    | 3.73                                              | -0.5                            | 166.9     | 0.10                                |
| 3.90                         | -159.30   | 0.09                                              | 21.93                  | -25.23    | 6.70                                              | -29.1                           | 168.0     | 0.84                                |
| -0.53                        | 166.95    | 0.23                                              | 24.55                  | -22.83    | 5.21                                              | -21.2                           | -159.8    | 0.11                                |
| -14.25                       | -170.60   | 0.15                                              | 28.00                  | -21.98    | 2.40                                              | -14.2                           | -170.6    | 0.16                                |
| -21.25                       | -159.75   | 0.21                                              | 29.11                  | -15.45    | 4.15                                              | 28.2                            | -177.4    | 0.72                                |
| -22.15                       | 167.00    | 0.37                                              | 31.55                  | -24.67    | 2.36                                              | 21.3                            | -157.7    | 0.66                                |
| -29.08                       | 167.98    | 0.64                                              | 32.08                  | -64.25    | 1.90                                              | 33.5                            | 126.5     | 14.14                               |
| -34.50                       | 172.75    | 0.14                                              | 33.15                  | -21.98    | 1.76                                              | 26.9                            | 128.2     | 8.37                                |
| 40.00                        | 85.00     | 450.00                                            | 33.82                  | -21.02    | 4.75                                              | 3.9                             | -159.3    | 0.10                                |
| 32.00                        | 34.50     | 30.00                                             | 47.72                  | -20.87    | 3.10                                              | 11.3                            | 162.3     | 0.24                                |
| Tegen et al. (2002)          |           |                                                   | 47.83                  | -19.50    | 2.80                                              | 13.2                            | -59.4     | 14.48                               |
| -64.93                       | -2.59     | 0.52                                              | Mahowald et al. (2009) |           |                                                   | 28.3                            | -16.5     | 30.18                               |
| 5.37                         | -85.58    | 4.80                                              | 42.00                  | 9.0       | 15.43                                             | 32.3                            | -64.9     | 3.36                                |
| 50.00                        | -144.98   | 0.30                                              | -69.52                 | 170.6     | 0.002                                             | 53.3                            | -9.9      | 1.00                                |
| -20.07                       | 9.17      | 5.80                                              | -75.00                 | -170.6    | 0.003                                             | 25.8                            | -80.2     | 4.59                                |
| -20.05                       | 9.16      | 2.50                                              | -76.45                 | -175.5    | 0.003                                             | Mahowald et al. (2009)          |           |                                     |
| -20.05                       | 9.16      | 3.80                                              | -64.60                 | 140.3     | 0.001                                             | -21.5                           | 165.0     | 0.18                                |
| -35.52                       | 161.00    | 1.24                                              | -64.88                 | 141.0     | 0.001                                             | -28.2                           | -177.4    | 0.84                                |
| -17.76                       | 154.83    | 0.40                                              | -64.97                 | 141.4     | 0.001                                             | 21.3                            | -157.7    | 0.66                                |
| -12.99                       | 155.99    | 0.73                                              | -64.93                 | 141.2     | 0.001                                             | 11.3                            | -162.3    | 0.31                                |
| 0.00                         | 175.00    | 0.92                                              | -65.57                 | 74.9      | 0.002                                             | 3.9                             | 159.3     | 0.06                                |
| 0.00                         | 175.16    | 0.73                                              | -64.90                 | 75.0      | 0.003                                             | 43.1                            | 141.3     | 1.20                                |
| 1.22                         | 160.57    | 0.84                                              | -66.12                 | 75.3      | 0.002                                             | 37.9                            | 139.1     | 0.75                                |
| 5.01                         | 138.83    | 0.57                                              | -66.30                 | 75.7      | 0.002                                             | 52.7                            | 174.0     | 0.86                                |
| 12.02                        | 134.29    | 0.11                                              | -70.57                 | 76.9      | 0.002                                             | 30.0                            | -176.0    | 0.91                                |
| 30.00                        | 175.00    | 3.00                                              | -73.43                 | 76.2      | 0.002                                             | 21.5                            | -158.0    | 0.74                                |
| 34.42                        | 177.74    | 3.25                                              | -74.90                 | 74.5      | 0.001                                             | 11.5                            | 162.0     | 0.28                                |
| 37.40                        | 174.95    | 8.77                                              | -75.85                 | 71.5      | 0.001                                             | 3.9                             | -159.3    | 0.11                                |
| 40.00                        | 145.43    | 7.32                                              | -66.77                 | 112.8     | 0.001                                             | -0.5                            | 166.9     | 0.11                                |
| 46.12                        | 175.03    | 4.09                                              | 29.52                  | 34.9      | 5.83                                              | -13.5                           | -172.5    | 0.02                                |
| 46.82                        | 162.12    | 0.86                                              | 43.10                  | 141.3     | 5.20                                              | -21.5                           | 165.0     | 0.18                                |
| 10.00                        | 65.00     | 1.50                                              | 31.50                  | 35.3      | 44.57                                             | -29.0                           | 168.0     | 0.44                                |
| 14.48                        | 64.77     | 4.30                                              | 32.70                  | 35.5      | 285.71                                            | 13.2                            | -59.4     | 8.74                                |
| 15.47                        | 68.75     | 7.40                                              | 35.20                  | 24.8      | 21.26                                             | 32.3                            | -64.9     | 3.45                                |
| 15.98                        | 61.50     | 4.50                                              | 43.50                  | 4.8       | 11.31                                             | -40.7                           | 144.7     | 0.51                                |
| 16.25                        | 60.47     | 6.10                                              | 43.60                  | 7.3       | 1.80                                              | 16.7                            | -22.9     | 76.87                               |
| 17.40                        | 58.80     | 12.40                                             | 36.30                  | -5.4      | 22.80                                             | 33.5                            | 126.5     | 4.15                                |
| -2.18                        | -9.90     | 1.20                                              | 54.42                  | -7.2      | 2.09                                              | -8.5                            | 179.2     | 0.17                                |
| 1.79                         | -11.13    | 4.30                                              | 54.30                  | -8.6      | 1.57                                              | 26.9                            | 128.3     | 4.76                                |
| 11.48                        | -21.02    | 22.62                                             | 43.60                  | 7.3       | 32.00                                             | 28.3                            | -16.5     | 22.27                               |
|                              |           |                                                   |                        |           |                                                   | 53.3                            | -9.9      | 0.51                                |
|                              |           |                                                   |                        |           |                                                   | 27.8                            | -80.3     | 5.57                                |
